# Supplementary material for: Detection of Plasmid-Mediated β-Lactamase Genes and Emergence of a Novel AmpC (CMH-1) in Enterobacter cloacae at a Medical Center in Southern Taiwan
Source: MDPI journal article supplement (doi:10.3390/jcm8010008), 2018-12-20
Supplement: s1 [file s1]

LOCUS **blaCMH-1** 1146 bp DNA linear BCT 15-FEB-2012

DEFINITION Enterobacter cloacae strain 6 class C beta-lactamase CMH-1 (blaCMH-1) gene, complete cds. **JQ673557**

ACCESSION blaCMH-1

SOURCE Enterobacter cloacae

ORGANISM Enterobacter cloacae  
Bacteria; Proteobacteria; Gammaproteobacteria; Enterobacteriales; Enterobacteriaceae; Enterobacter; Enterobacter cloacae complex.

REFERENCE 1 (bases 1 to 1146)

AUTHORS Yu, W.-L., Lee, M.-F. and Chuang, Y.-C.

TITLE A novel **plasmid-borne ampC gene** (blaCMH-1) in an Enterobacter cloacae isolate from southern Taiwan

JOURNAL Submitted (15-FEB-2012) Departments of Intensive Care Medicine, Chi-Mei Medical Center, No. 901 Zhonghua Rd., YongKang Dist., Tainan, Taiwan 710, Republic of China

FEATURES

source 1..1146  
/organism="Enterobacter cloacae"  
/mol\_type="genomic DNA"  
/strain="6"  
/isolation\_source="blood"  
/db\_xref="taxon:550"  
/note="[cultured bacterial source]"

gene 1..1146  
/gene="blaCMH-1"

CDS 1..1146  
/gene="blaCMH-1"  
/function="beta-lactamase"  
/note="class C beta-lactamase CMH-1"  
/codon\_start=1  
/transl\_table=11  
/product="beta-lactamase CMH-1"  
/translation="MMTKSLSCALLSVACSAFAAPMSEKQLADVVERTVTP  
LMKAQAIPGMAVAVIYQGQPHYFTFGKADVAANKPVTPQTLFELGS  
VSKTFTGVLGGDAIARKEISLADPVTKYWPGLTGKQWQGIRLLDLAT  
YTAGGLPLQVPDDVTDNASLLRFYQSWQPKWAPGTTRLYANTSIGL  
FGSLAVKPSGMCFEQAMAERVFKPLKLNHTWINVPHAEPPHYAWGY  
REGKAVHVSFGMLDAEAYGVKSNVKDMASWVMANMAPETLPQST  
LQGGIALAQSRVWRVGAMYQGLGWEMLNWPVDAKTVDGSDNK  
VALAPLPVAEVNPPAPPVKASWVHKTGSTGGFGSYVAFIPEKQIGIVM  
LANKSYNPNVRVETAYRILDALQ\*"

BASE COUNT 252 a 316 c 334 g 244 t

ORIGIN

1 atgatgacaa aatccetaag ctgcgcgctg ctgcctcagg ttgcctgctc tgettttgc  
61 gcgcgcgatg cagaaaaaca gctggctgac gtcgtggaac gtaccgttac gcctctgatg  
121 aagggcgagg ccataccggg aatggcgctg gcgcctattt atcaggggcca gccacactat  
181 tttaatttcg gtaaagcaga cgtgcggcgc aataagcccg tcacgcgcga aacctattt  
241 gagctgggct cgtcagcaa aaccttacc ggcgtgctgg gtggcgatgc cattgcccgc  
301 aaagagattt cgtggcgca cccggtcac aaatattggt ctgaattgac ggccaagcag  
361 tggcaaggca ttgcctgct agacctggca acctataccg caggcggatt gccgttgca  
421 gtaccggatg atgtcacga taacgctct ctgctgcgtt tctaccagtc ctggcagcca  
481 aagtgggccc cgggtaccac gcgtctgtac gccaacacca gcacgggttt gtttggtca  
541 ctggcgggta aaccgtccgg catgtcttc gacgagccca tggcggagcg ggtctttaag  
601 cccctgaaac tcaaccatac gtggataaac gtccacacg ctgaagaacc gactacgca  
661 tgggggttat gtaggggaaa agcgggtcac gtttcgctg gtatgctgga tgcagaagcc  
721 tatggcggtg aatctaactg caaagatatg gcgagttggg tgatggccaa tatggcaact  
781 gagacactec cgcagtcac tetgcagcag ggtattgcgc tggcgcagtc tgcctactgg  
841 cgcgtgggtg ccatgtatca aggggttagc tgggagatgc tcaactggcc ggtcagtgcc  
901 aaaaccgtgg tggatggcag cgataataag gtgcactgg cgcggtgccc ggtcgcagaa  
961 gtgaatectc cggtccgcc agtaaaagcc tctgggtgct ataaaacggg ctctacgggt  
1021 ggggtttgca gctacgtggc gtttattct gaaaagcaga tcggtattgt gatgctcgca  
1081 aataaaagct atccgaaccc ggtacgggtg gaaacggctt accgtatctc cgaacgcgcta  
1141 cagtaa

Supplementary Figure1. Complete DNA sequence of *bla*<sub>CMH-1</sub> gene (accession number JQ673557).

```

>[ref|YP_003611068.1| G class C beta-lactamase [Enterobacter cloacae subsp. cloacae ATCC 13047]
gb|ADF60119.1| G class C beta-lactamase [Enterobacter cloacae subsp. cloacae ATCC 13047]
Length=381

GENE ID: 9123062 ampC | class C beta-lactamase
[Enterobacter cloacae subsp. cloacae ATCC 13047] (10 or fewer PubMed links)

Score = 777 bits (2007), Expect = 0.0, Method: Compositional matrix adjust.
Identities = 379/381 (99%), Positives = 379/381 (99%), Gaps = 0/381 (0%)

Query 1 MMTKSLSCALLLSVACSAFAAPMSEKQLADVVERTVTPLMKAQAIPGMMAVAVIYQGQPHY 60 Ent. C 6 (CMH-1)
Sbjct 1 MMTKSLSCALLLSVACSAFAAPMSEKQLADVVERTVTPLMKAQAIPGMMAVAVIYQGQPHY 60

Query 61 FTFGKADVAANKPVTPTQLFELGVSVKTFVTGVLGGDAIARKEISLADPVTKYWPELTGKQ 120
Sbjct 61 FTFGKADVAANKPVTPTQLFELGVSVKTFVTGVLGGDAIARKEISLADPVTKYWPELTGKQ 120

Query 121 WQGIRLLDLATYTAGGLPLQVPDDVDNLSLLRFYQSWQPKWAPGTTIRLYANTSIGLFGS 180
Sbjct 121 WQGIRLLDLATYTAGGLPLQVPDDVDNLSLLRFYQSWQPKWAPGTTIRLYANTSIGLFGS 180

Query 181 LAVKPSGMCFEQAMAERVFVKPLKLNHTWINVPHAEAPHYAWGYREGKAVHVSFGMLDAEA 240
Sbjct 181 LAVKPSGMCFEQAMAERVFVKPLKLNHTWINVPHAEAPHYAWGYREGKAVHVSFGMLDAEA 240

Query 241 YGVKSNVKDMASWVMANMAPETLPQSTLQQGIALAQSRVWVGAMYQGLGWEMLNWPFVDA 300
Sbjct 241 YGVKSNVKDMASWVMANMAPETLPQSTLQQGIALAQSRVWVGAMYQGLGWEMLNWPFVDA 300

Query 301 KTVVDGSDNKVALAPLPVAEVNPPAPPVKASWVHKTGSTGGFGSYVAFIPEKQIGIVMLA 360
Sbjct 301 KTVVDGSDNKVALAPLPVAEVNPPAPPVKASWVHKTGSTGGFGSYVAFIPEKQIGIVMLA 360

Query 361 NKSYPNPFVRVETAYRILDALQ 381
Sbjct 361 NKSYPNPFVRVETAYRILDALQ 381

```

Supplementary Figure 2. The *bla*CMH-1 gene has high identities of 99% to a chromosomally intrinsic ampC gene in *Enterobacter cloacae* ATCC 13047 strain (accession number YP\_003611068).

```

>[ref|YP_004712370.1| G class C beta-lactamase ACT-9 [Pantoea agglomerans]
gb|AEI70575.1| G class C beta-lactamase ACT-9 [Pantoea agglomerans]
Length=380

GENE ID: 10929439 ampC | class C beta-lactamase ACT-9 [Pantoea agglomerans]

Score = 699 bits (1804), Expect = 0.0, Method: Compositional matrix adjust.
Identities = 333/380 (88%), Positives = 354/380 (93%), Gaps = 0/380 (0%)

Query 1 MMTKSLSCALLLSVACSAFAAPMSEKQLADVVERTVTPLMKAQAIPGMMAVAVIYQGQPHY 60 EntC-6 (CMH-1)
Sbjct 1 MTKSLCALLLS+CSAAPMSEKQL+DVVERTVTPLMKAQAIPGMMAVAVIYQGQPHY 60

Query 61 FTFGKADVAANKPVTPTQLFELGVSVKTFVTGVLGGDAIARKEISLADPVTKYWPELTGKQ 120
Sbjct 61 FTFGKADVANKPVTPTQLFELGS+SKTFVTGVLGGDAIAR EISLDPVTKYWPELTGKQ 120

Query 121 WQGIRLLDLATYTAGGLPLQVPDDVDNLSLLRFYQSWQPKWAPGTTIRLYANTSIGLFGS 180
Sbjct 121 WQGIR+LDLATYTAGGLPLQVPD+VDNLSLLRFYQWQ+WPGTTIRLYAN SIGLFG+ 180

Query 181 LAVKPSGMCFEQAMAERVFVKPLKLNHTWINVPHAEAPHYAWGYREGKAVHVSFGMLDAEA 240
Sbjct 181 LAVKPSGMNFEQAMTKRVFKPLKLDHTWINVPEEEAHYANGYRDGKAHVHVSFGMLDAEA 240

Query 241 YGVKSNVKDMASWVMANMAPETLPQSTLQQGIALAQSRVWVGAMYQGLGWEMLNWPFVDA 300
Sbjct 241 YGVK+N+DMASW+ANM P+LSTL+QGIALAQSRVWVGAMYQGLGWEMLNWPFV+A 300

Query 301 KTVVDGSDNKVALAPLPVAEVNPPAPPVKASWVHKTGSTGGFGSYVAFIPEKQIGIVMLA 360
Sbjct 301 KTVV+GSDNKVALAPLVAEVNPPAPPVKASWVHKTGSTGGFGSYVAFIPEK++GIVMLA 360

Query 361 NKSYPNPFVRVETAYRILDAL 380
Sbjct 361 NKSYPNPARVEAAYRILSAL 380

```

Supplementary Figure 3. The *bla*CMH-1 gene has 88% identities to a chromosomal ACT-9 gene in *Pantoea agglomerans* (accession number YP\_004712370).

```

>  emb|CAJ28994.1 Class C beta-lactamase ACT-2 [Enterobacter asburiae]
Length=381

Score = 699 bits (1803), Expect = 0.0, Method: Compositional matrix adjust.
Identities = 331/380 (87%), Positives = 355/380 (93%), Gaps = 0/380 (0%)

Query 1 MMTKSLSCALLLSVACSAFAAPMSEKQLADVVERTVTPLMKAQAIPGMAVAVIYQGQPHY 60 EntC-6 (CMH-1)
Sbjct 2 MMTKSLCALLLS +CS A PMSEKQLA+VVERTVTPLMKAQAIPGMAVAVIY+GQPHY 61

Query 61 FTFGKADVAANKPVTPTLTFELGSVSKTFTGVLGGDAIARKEISLADPVTKYWPGLTGKQ 120
Sbjct 62 FTFGKADVAANKPVTPTLTFELGS+SKTFTGVLGGDAIAR EISL DPVTKYWPGLTGKQ 121

Query 121 WQGIRLLDLATYTAGGLPLQVPDDVIDNASLLRFYQSWQPKWAPGTTIRLYANTSIGLFGS 180
Sbjct 122 WQGIRMLDLATYTAGGLPLQVPDEVIDNASLLRFYQNWQPKWAPGTTIRLYANASIGLFGA 181

Query 181 LAVKPSGMCFEQAMAERVFPLKLNHTWINVPAAEAPHYANGYREGKAVHVSFGMLDAEA 240
Sbjct 182 LAVKPSGMSYEQAITTRVFPLKLDHTWINVPKAAEAHYANGYRDGKAVHVSFGMLDAEA 241

Query 241 YGVKSNVKDMASWVMANMAPETLPQSTLQQGIALAQSRVWVGAMYQGLGWEMLNWPFVDA 300
Sbjct 242 YGVKTNVQDMASWVMNMKPDLSLQDNLRLKGLTLAQSRVWVGAMYQGLGWEMLNWPFVDA 301

Query 301 KTVVDGSDNKVALAPLPVAEVPAPPPVNASWVHKTGSTGGFGSYVAFIPEKQIGIVMLA 360
Sbjct 302 KTVVVGSDNKVALAPLPAREVNPPAPPPVNASWVHKTGSTGGFGSYVAFIPEKQLGIVMLA 361

Query 361 NKSYPNPVRVETAYRILDAL 380
Sbjct 362 NKSYPNPARVEAAYRILSAL 381

```

Supplementary Figure 4. The *bla*CMH-1 gene has 87% identities to a chromosomal ACT-2 gene in *Enterobacter asburiae* (accession number CAJ28994).
